# Supplementary material for: Core-Shell Beads as Microreactors for Phylogrouping of E. coli Strains
Source: PubMed Central journal article supplement (PMC7464145; doi:10.3390/mi11080761), 2020-08-07
Supplement: micromachines-11-00761-s001.pdf [file micromachines-11-00761-s001.pdf]

# Supplementary Materials: Core-Shell Beads as Microreactors for Phylogrouping of *E. coli* Strains

Lena Gorgannezhad, Kamalalayam Rajan Sreejith, Melody Christie, Jing Jin,  
Chin Hong Ooi, Mohammad Katouli, Helen Stratton and Nam-Trung Nguyen

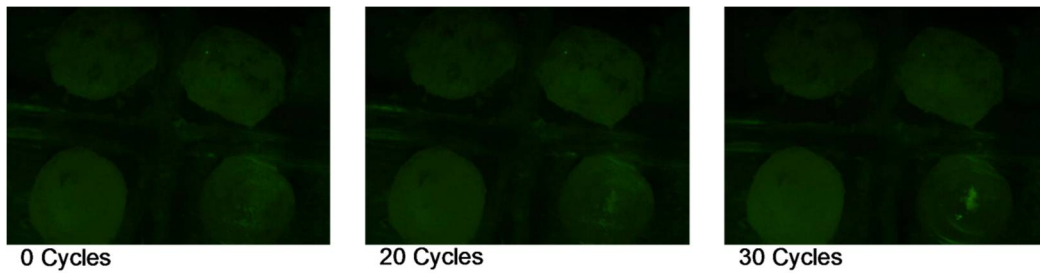

Figure S1. Photographs of one set of the beads during thermal cycling.

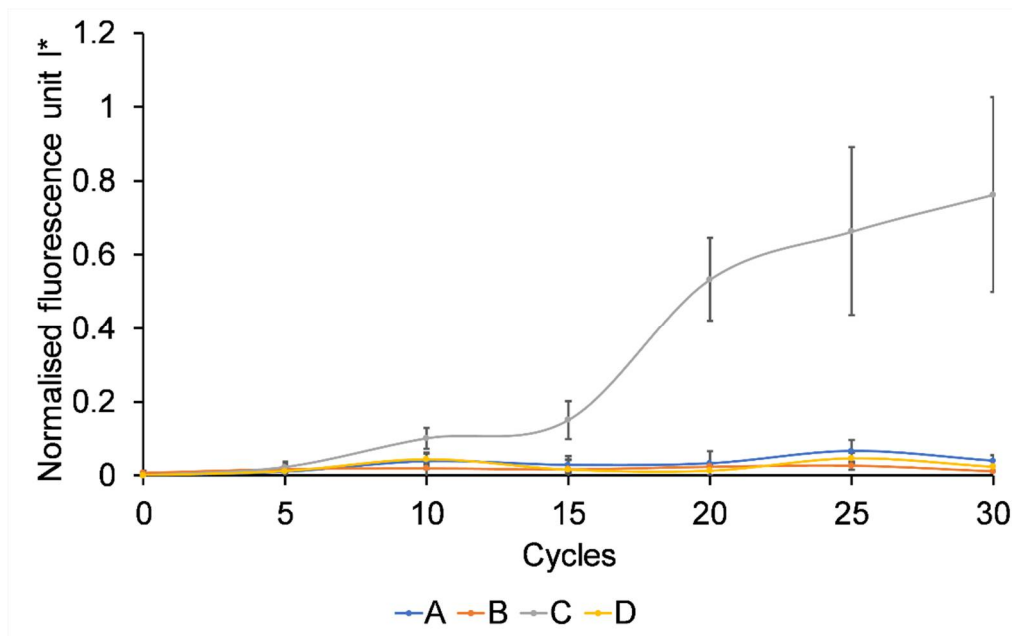

Figure S2. Reproducibility test of amplification for an unknown *E. coli* strain using core shell beads.

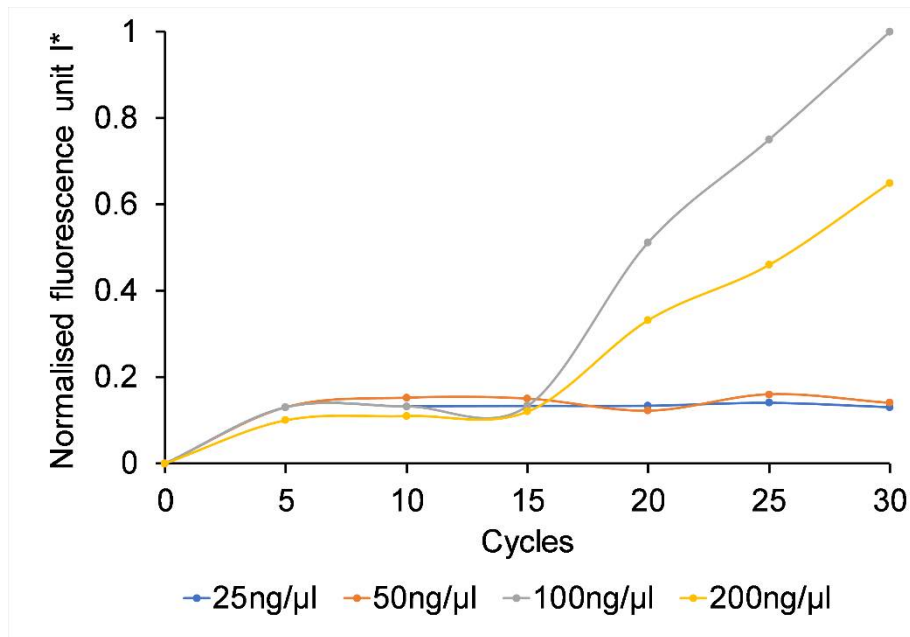

**Figure S3.** Sensitivity test of amplification for one unknown *E. coli* strain with different concentrations using core shell beads.
